# Supplementary material for: The Influence of Seasonal Climate Variability on Vehicle Exhaust PM2.5 in the State of California: A Hybrid Approach based on Artificial Neural Network and Spatial Analysis
Source: Preprints.org preprint supplement (doi:10.20944/preprints202010.0075.v2), 2020-10-15
Supplement: Supplementary file 1 [file supplementary]

Supplemental Material

The Influence of Seasonal Climate Variability on Vehicle Exhaust PM2.5 in the State of California: A Hybrid Approach based on Artificial Neural Network and Spatial Analysis

Fan Yu1, Amin Mohebbi2,*, Shiqing Cai3, Simin Akbariyeh4, Brendan J. Russo5, and Edward J. Smaglik6,

1 Department of Civil Engineering, Construction Management, and Environmental Engineering, Northern Arizona University, Flagstaff, AZ 86011, USA; [fy55@nau.edu](mailto:fy55@nau.edu)

2 Department of Civil Engineering, Construction Management, and Environmental Engineering, Northern Arizona University, Flagstaff, AZ 86011, USA; [Amin.Mohebbi@nau.edu](mailto:Amin.Mohebbi@nau.edu)

3 Department of Civil Engineering, Construction Management, and Environmental Engineering, Northern Arizona University, Flagstaff, AZ 86011, USA; [sc2729@nau.edu](mailto:sc2729@nau.edu)

4 Department of Civil Engineering, Construction Management, and Environmental Engineering, Northern Arizona University, Flagstaff, AZ 86011, USA; Simin.Akbariyeh@nau.edu

5 Department of Civil Engineering, Construction Management, and Environmental Engineering, Northern Arizona University, Flagstaff, AZ 86011, USA; Brendan.Russo@nau.edu

6 Department of Civil Engineering, Construction Management, and Environmental Engineering, Northern Arizona University, Flagstaff, AZ 86011, USA; [Edward.Smaglik@nau.edu](mailto:Edward.Smaglik@nau.edu)

* Correspondence: [amin.mohebbi@nau.edu](mailto:amin.mohebbi@nau.edu); Tel.: +1-928-523-4769

Received: date; Accepted: date; Published: date


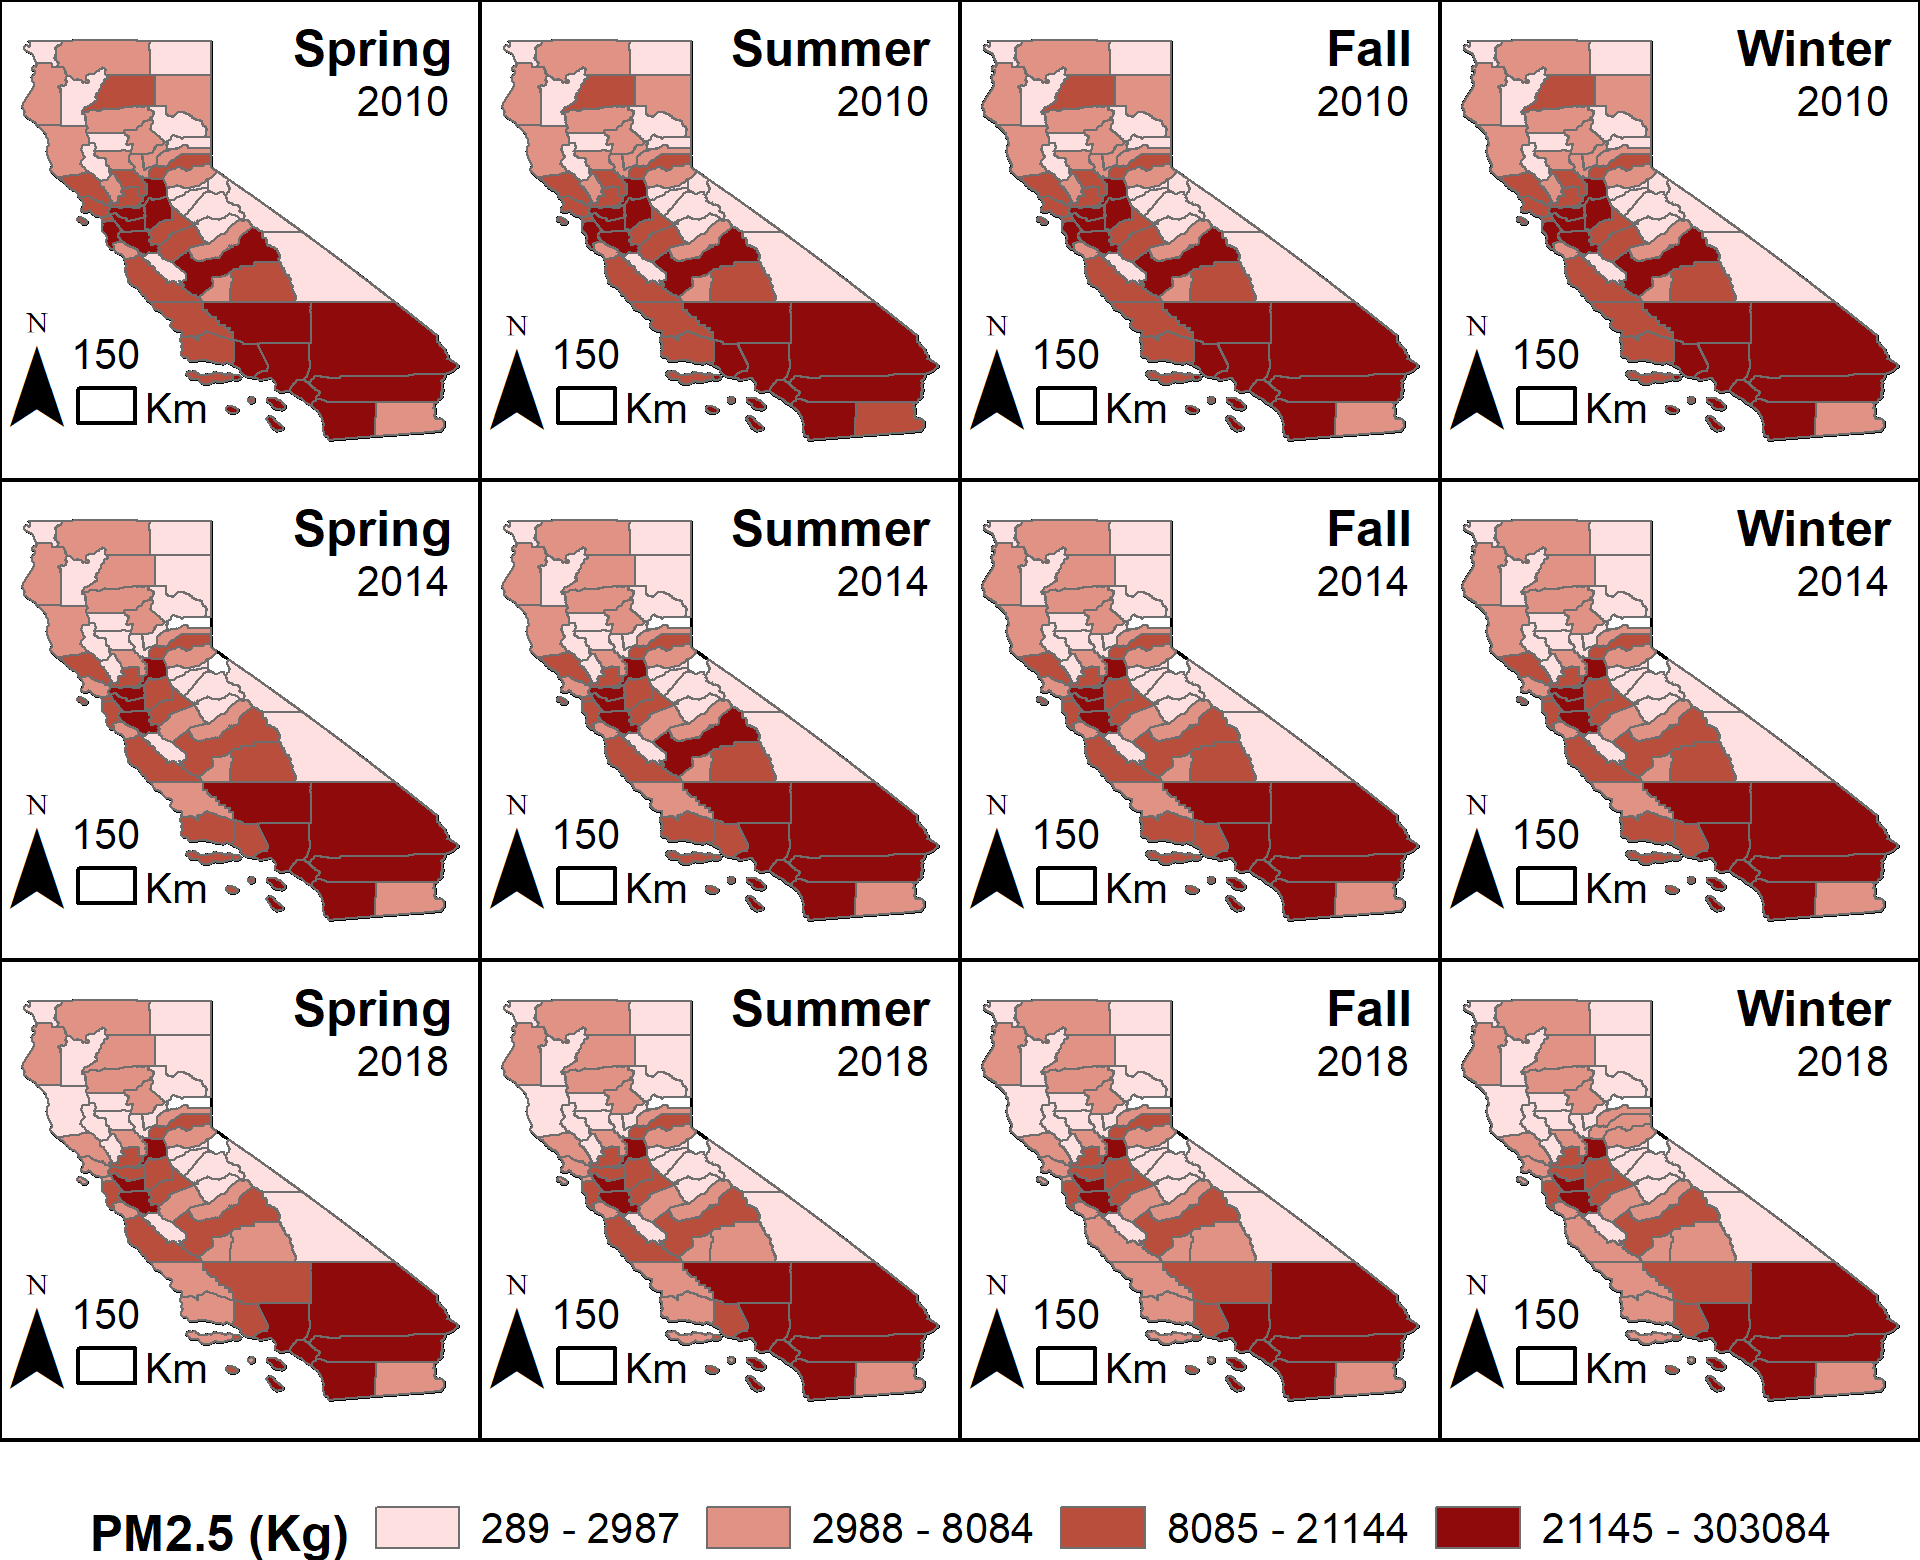


**Figure S1.** Seasonal PM2.5 averages in the state of California for years 2010, 2014, and 2018 calculated by EPA MOVES


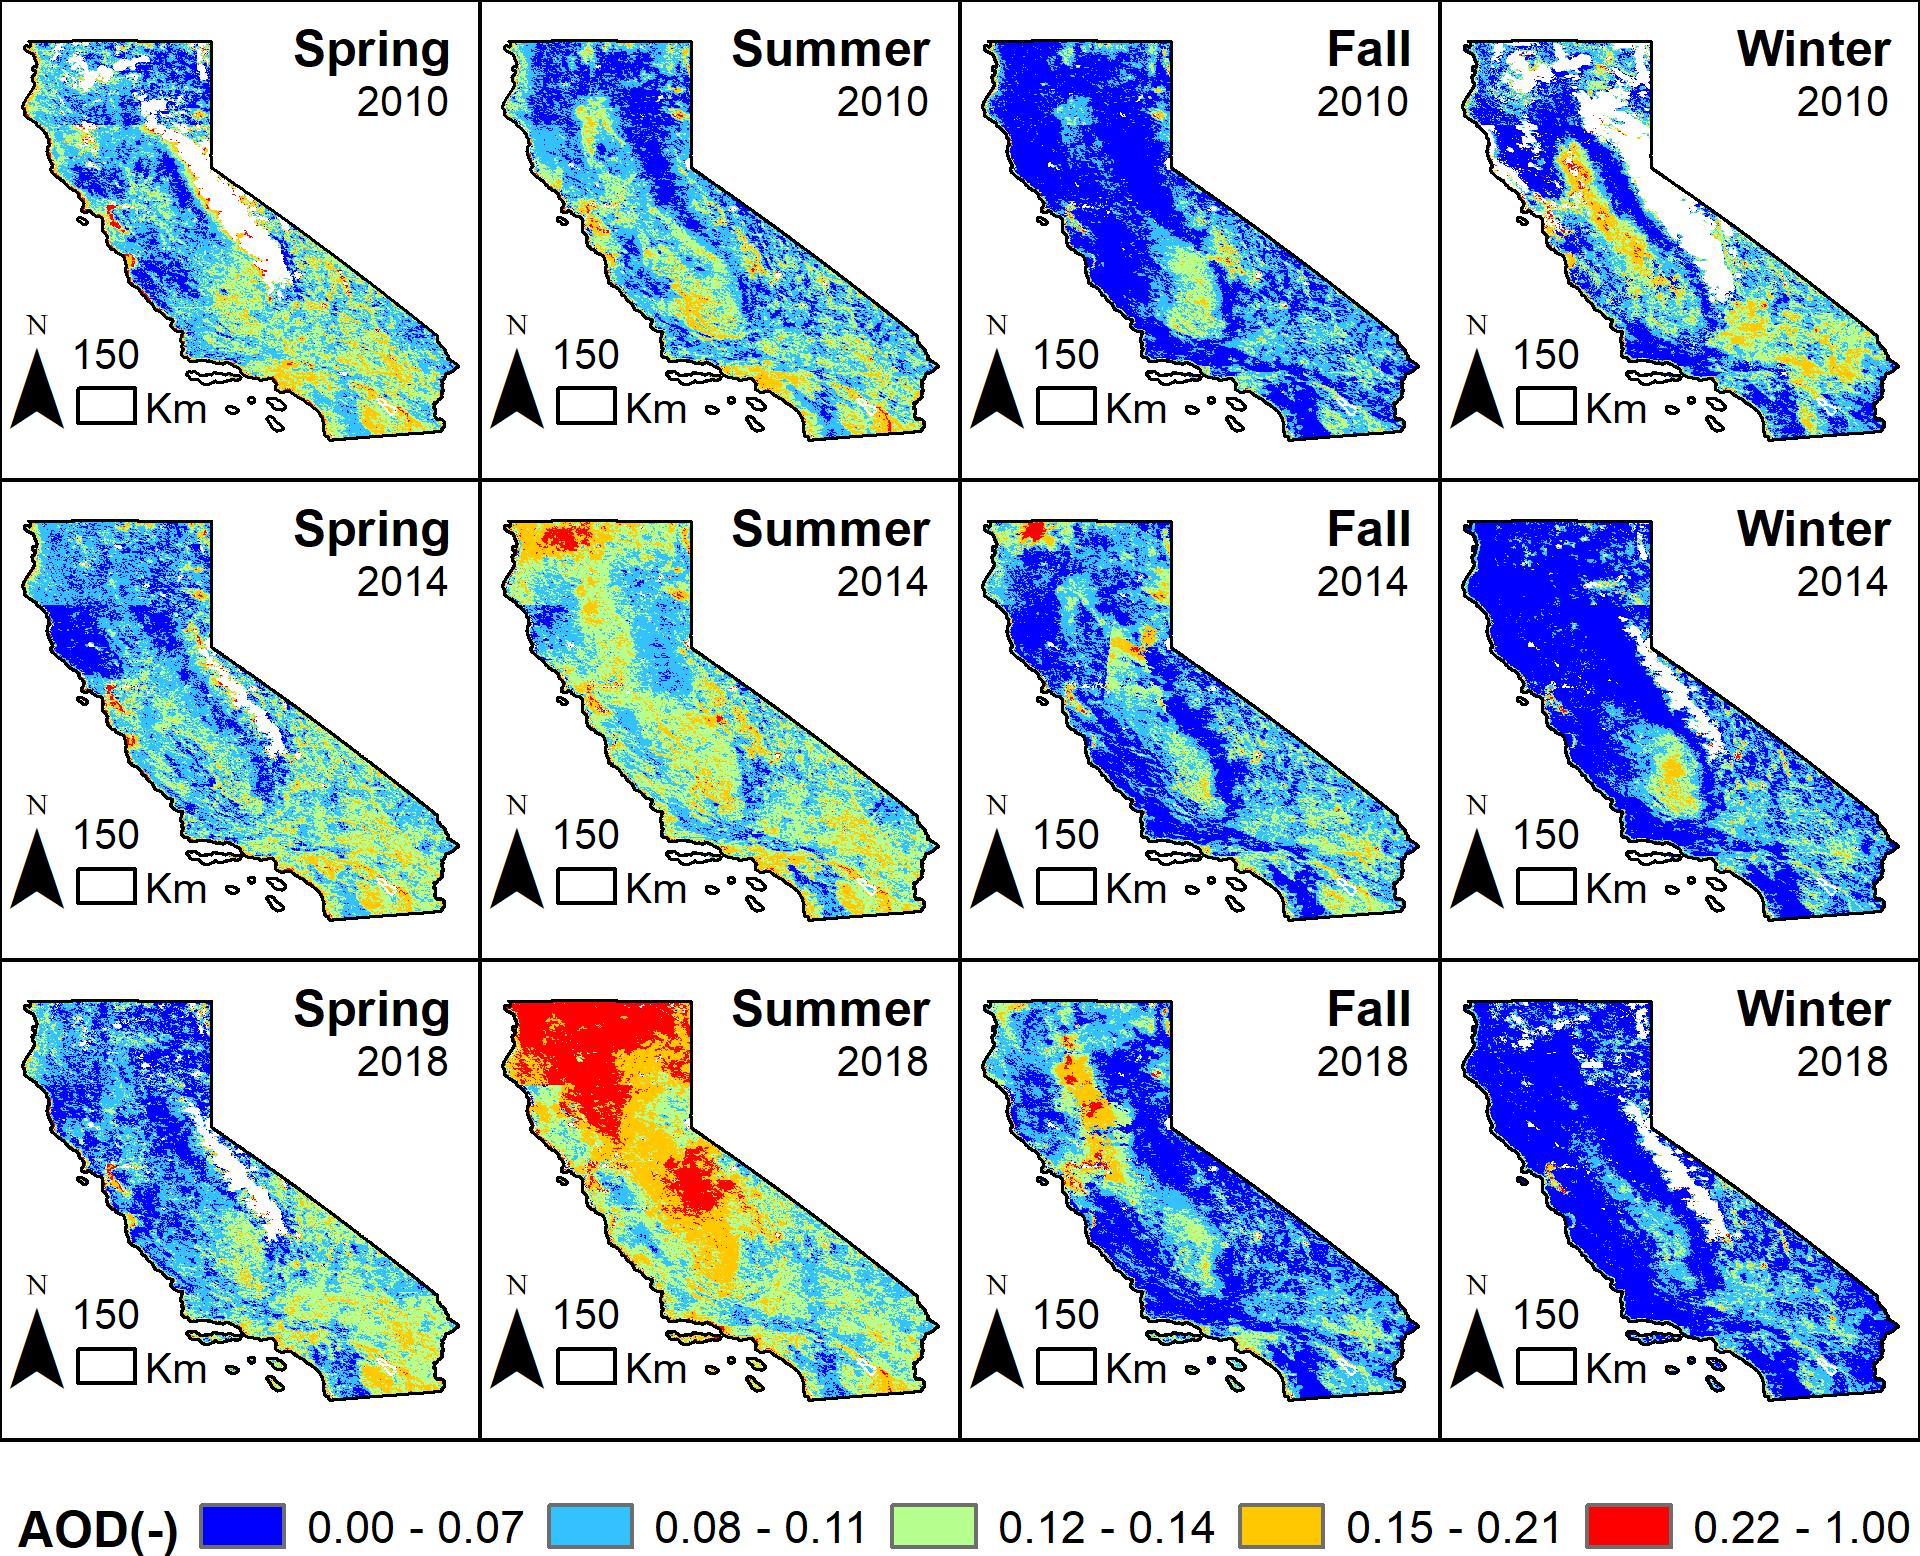


**Figure S2.** Seasonal AOD averages in the state of California for years 2010, 2014, and 2018 observed by MODIS satellite


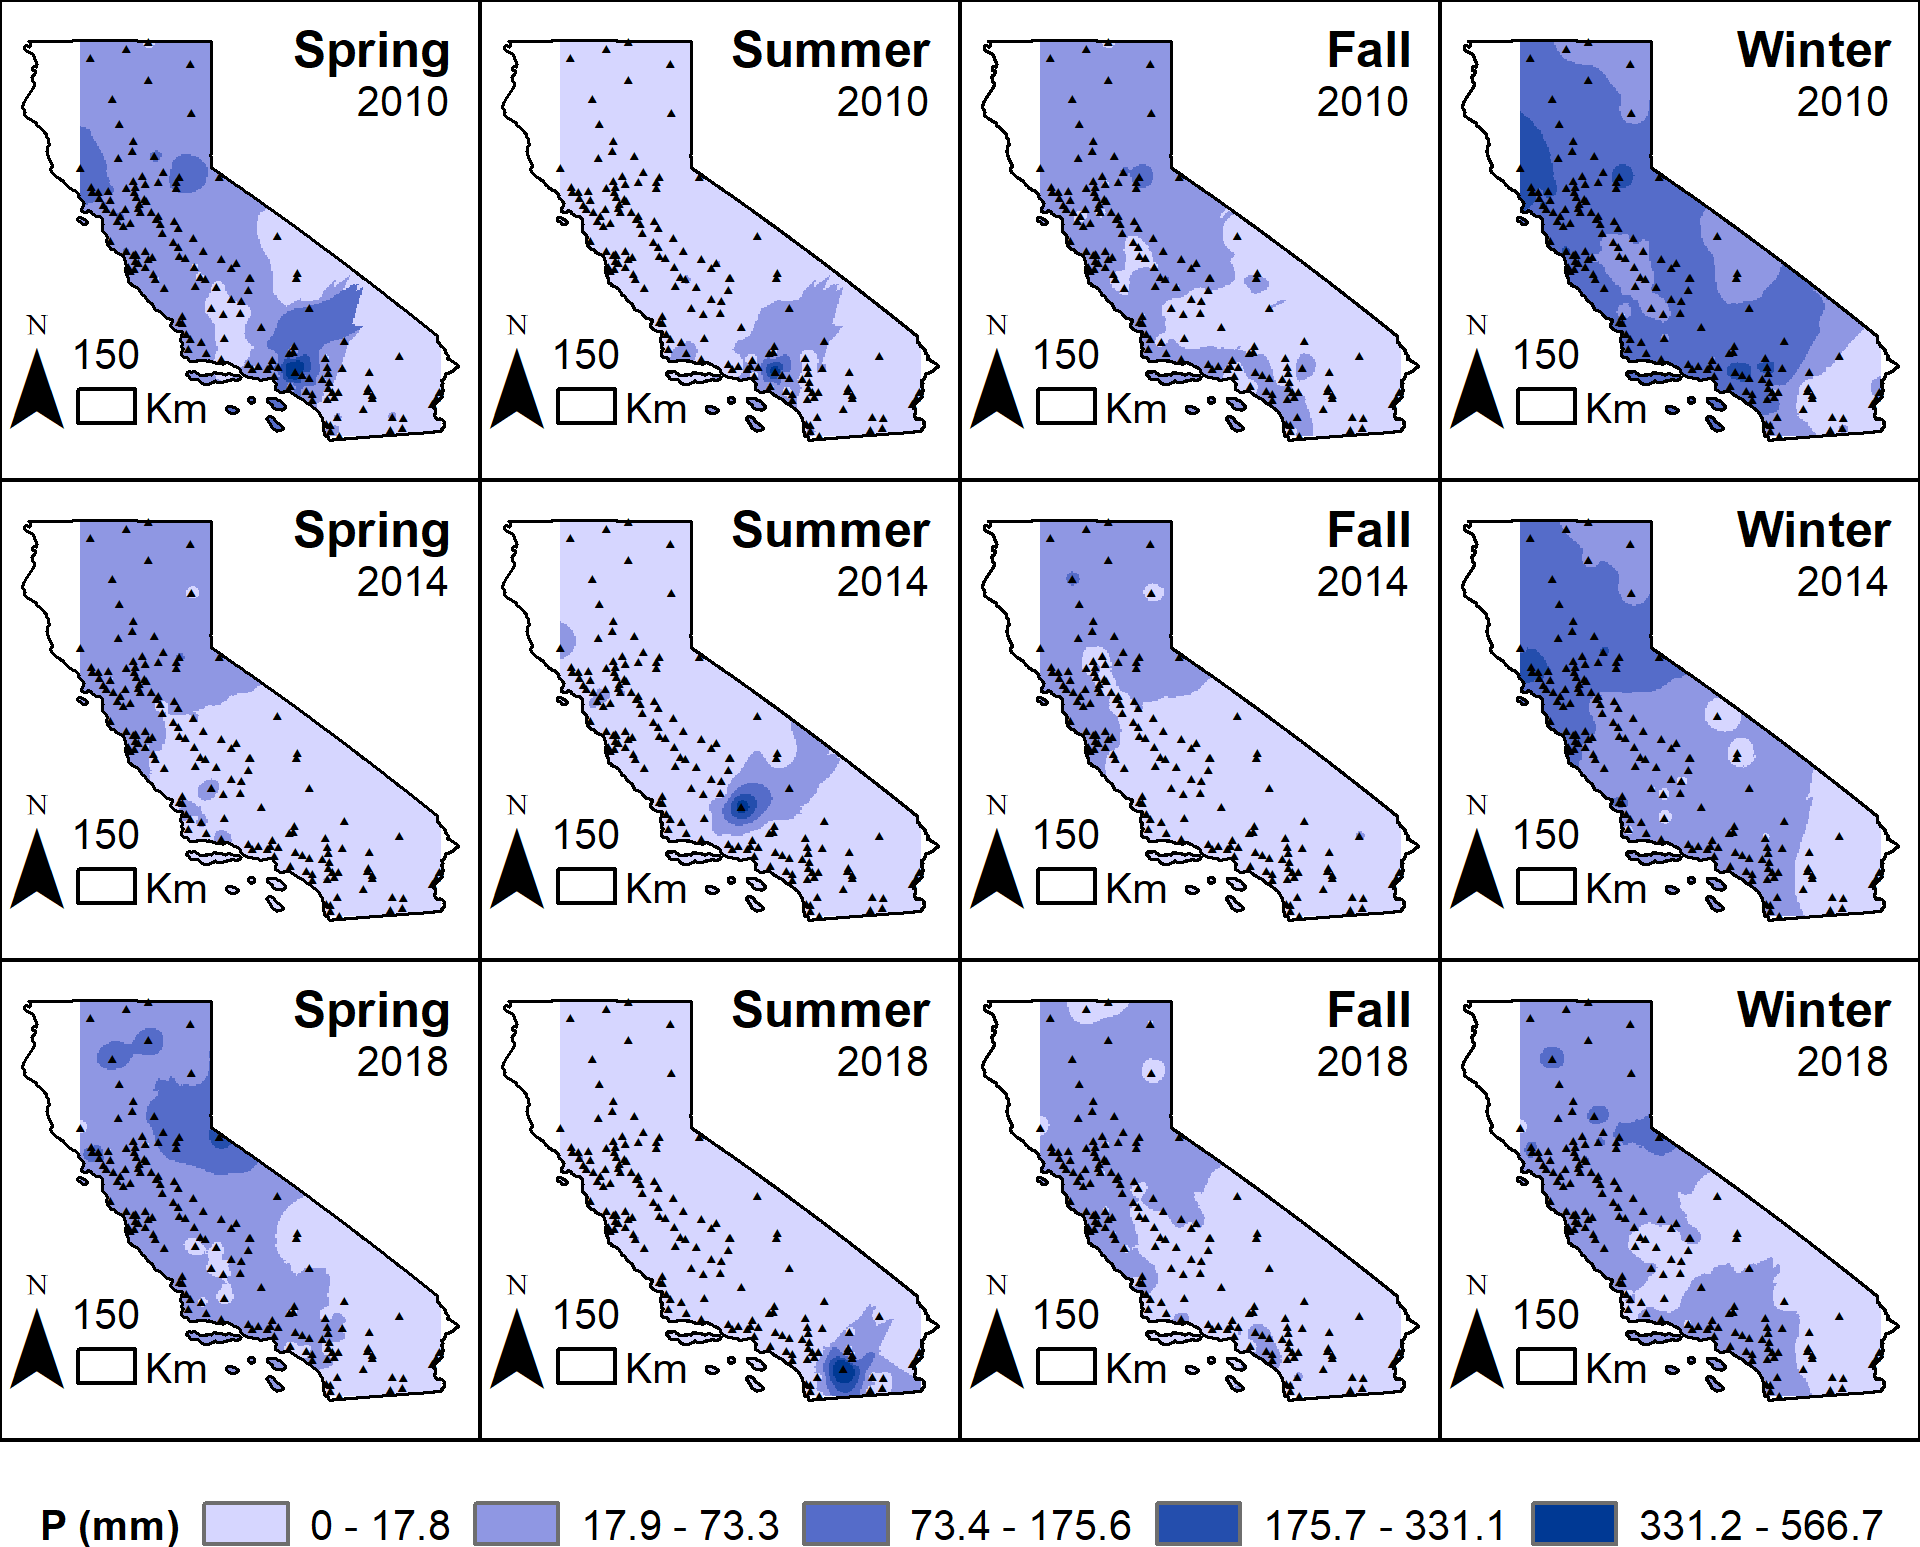


**Figure S3.** Seasonal precipitation averages in the state of California for years 2010, 2014, and 2018 measured by CIMIS


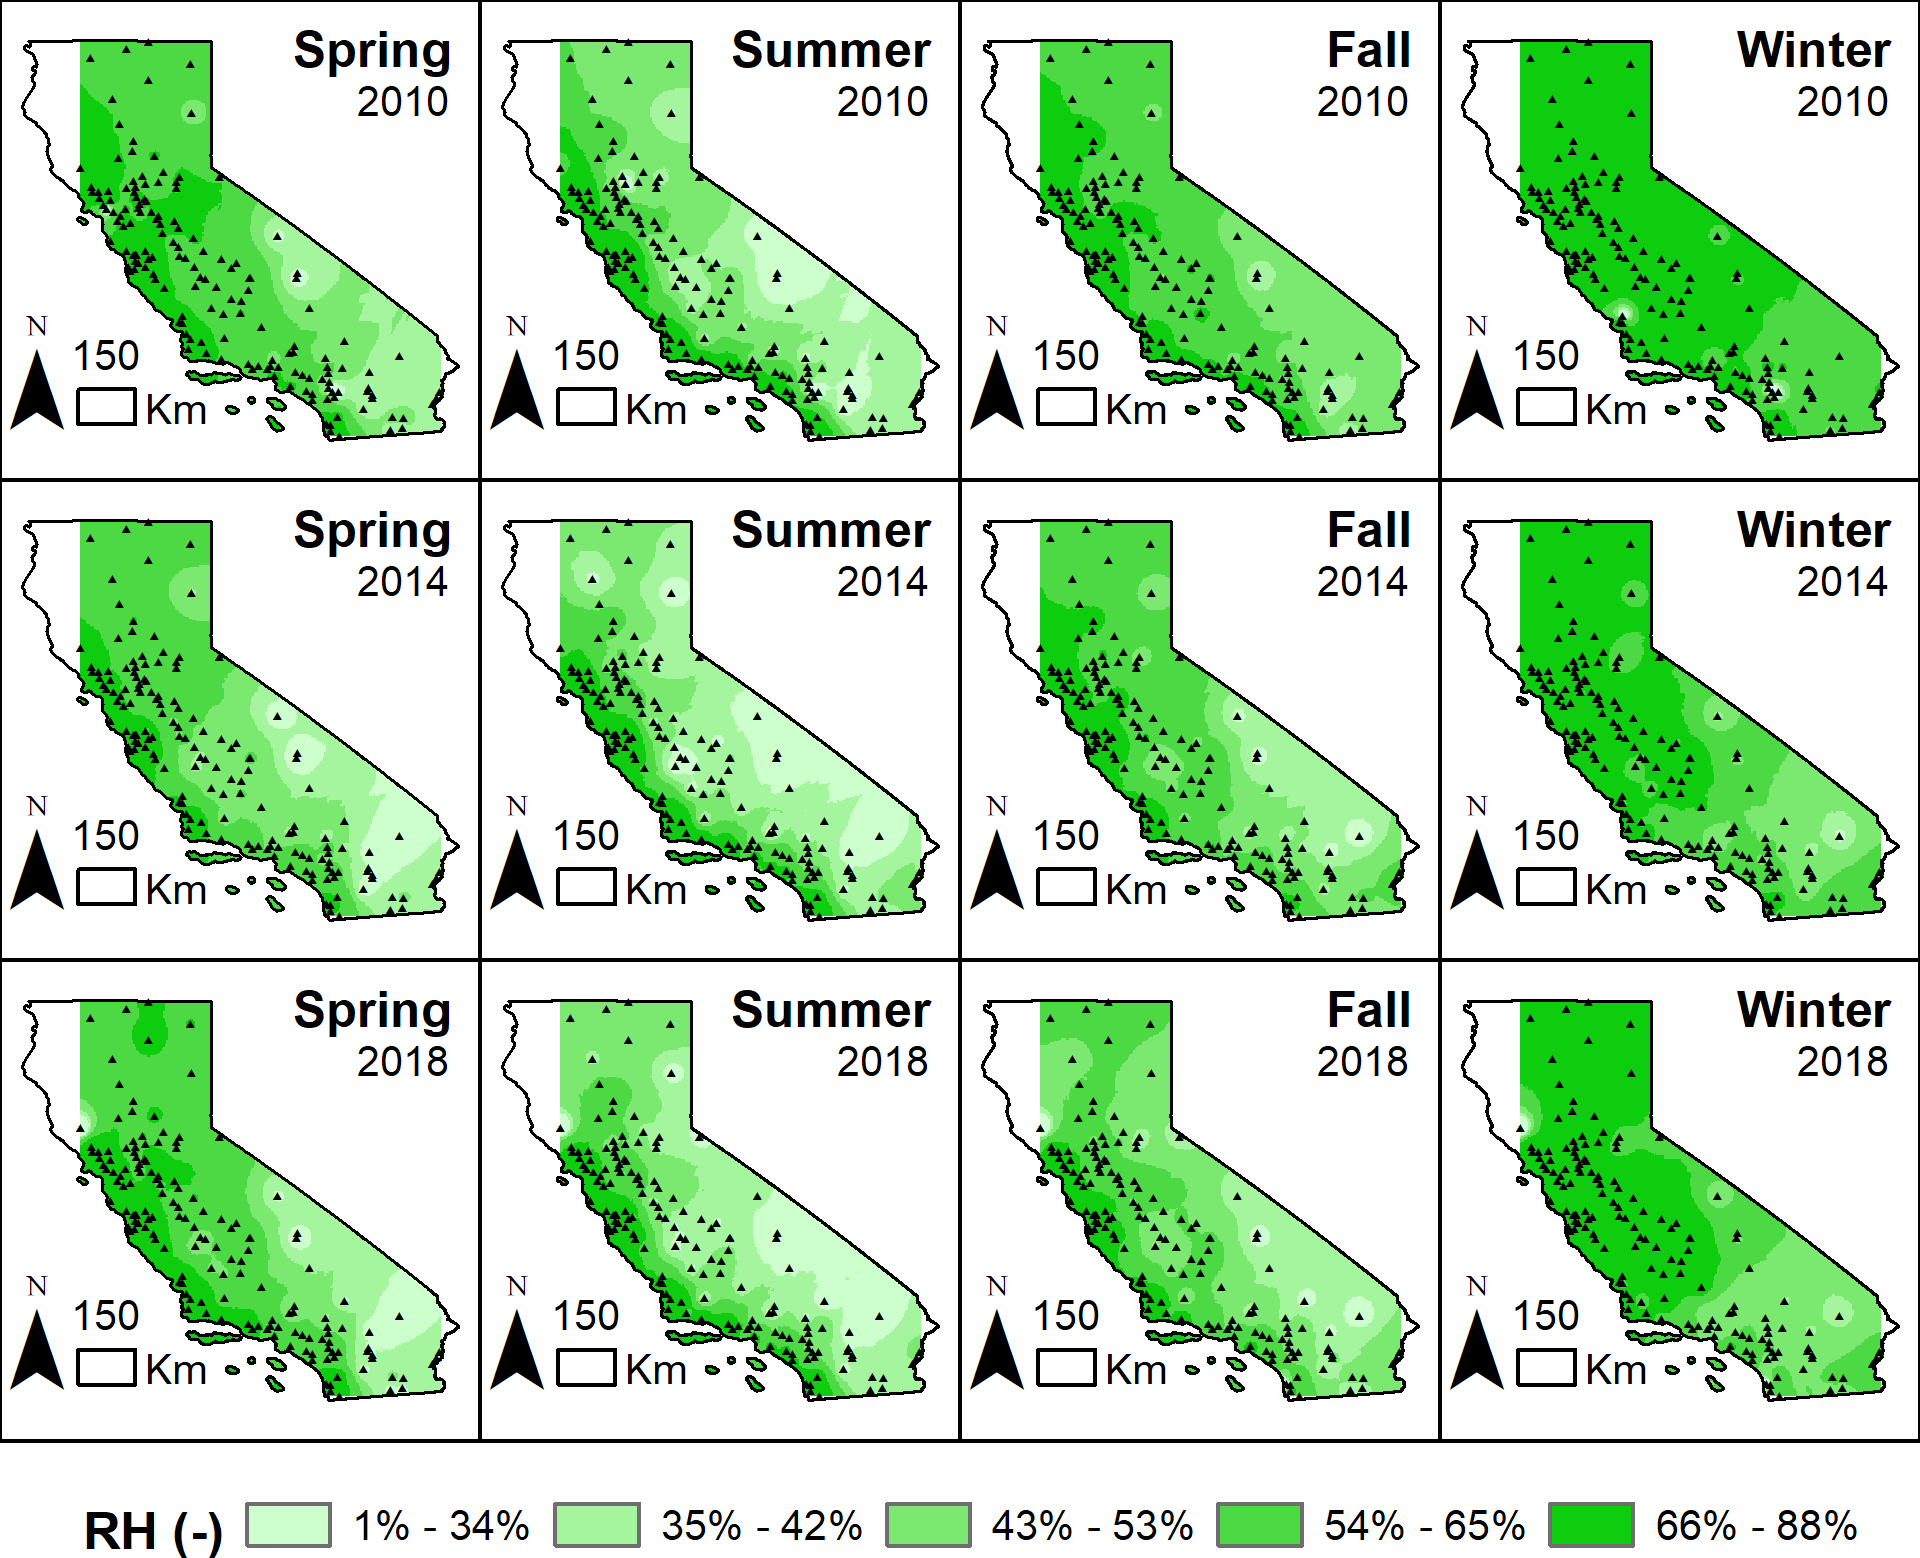


**Figure S4.** Seasonal relative humidity averages in the state of California for years 2010, 2014, and 2018 measured by CIMIS


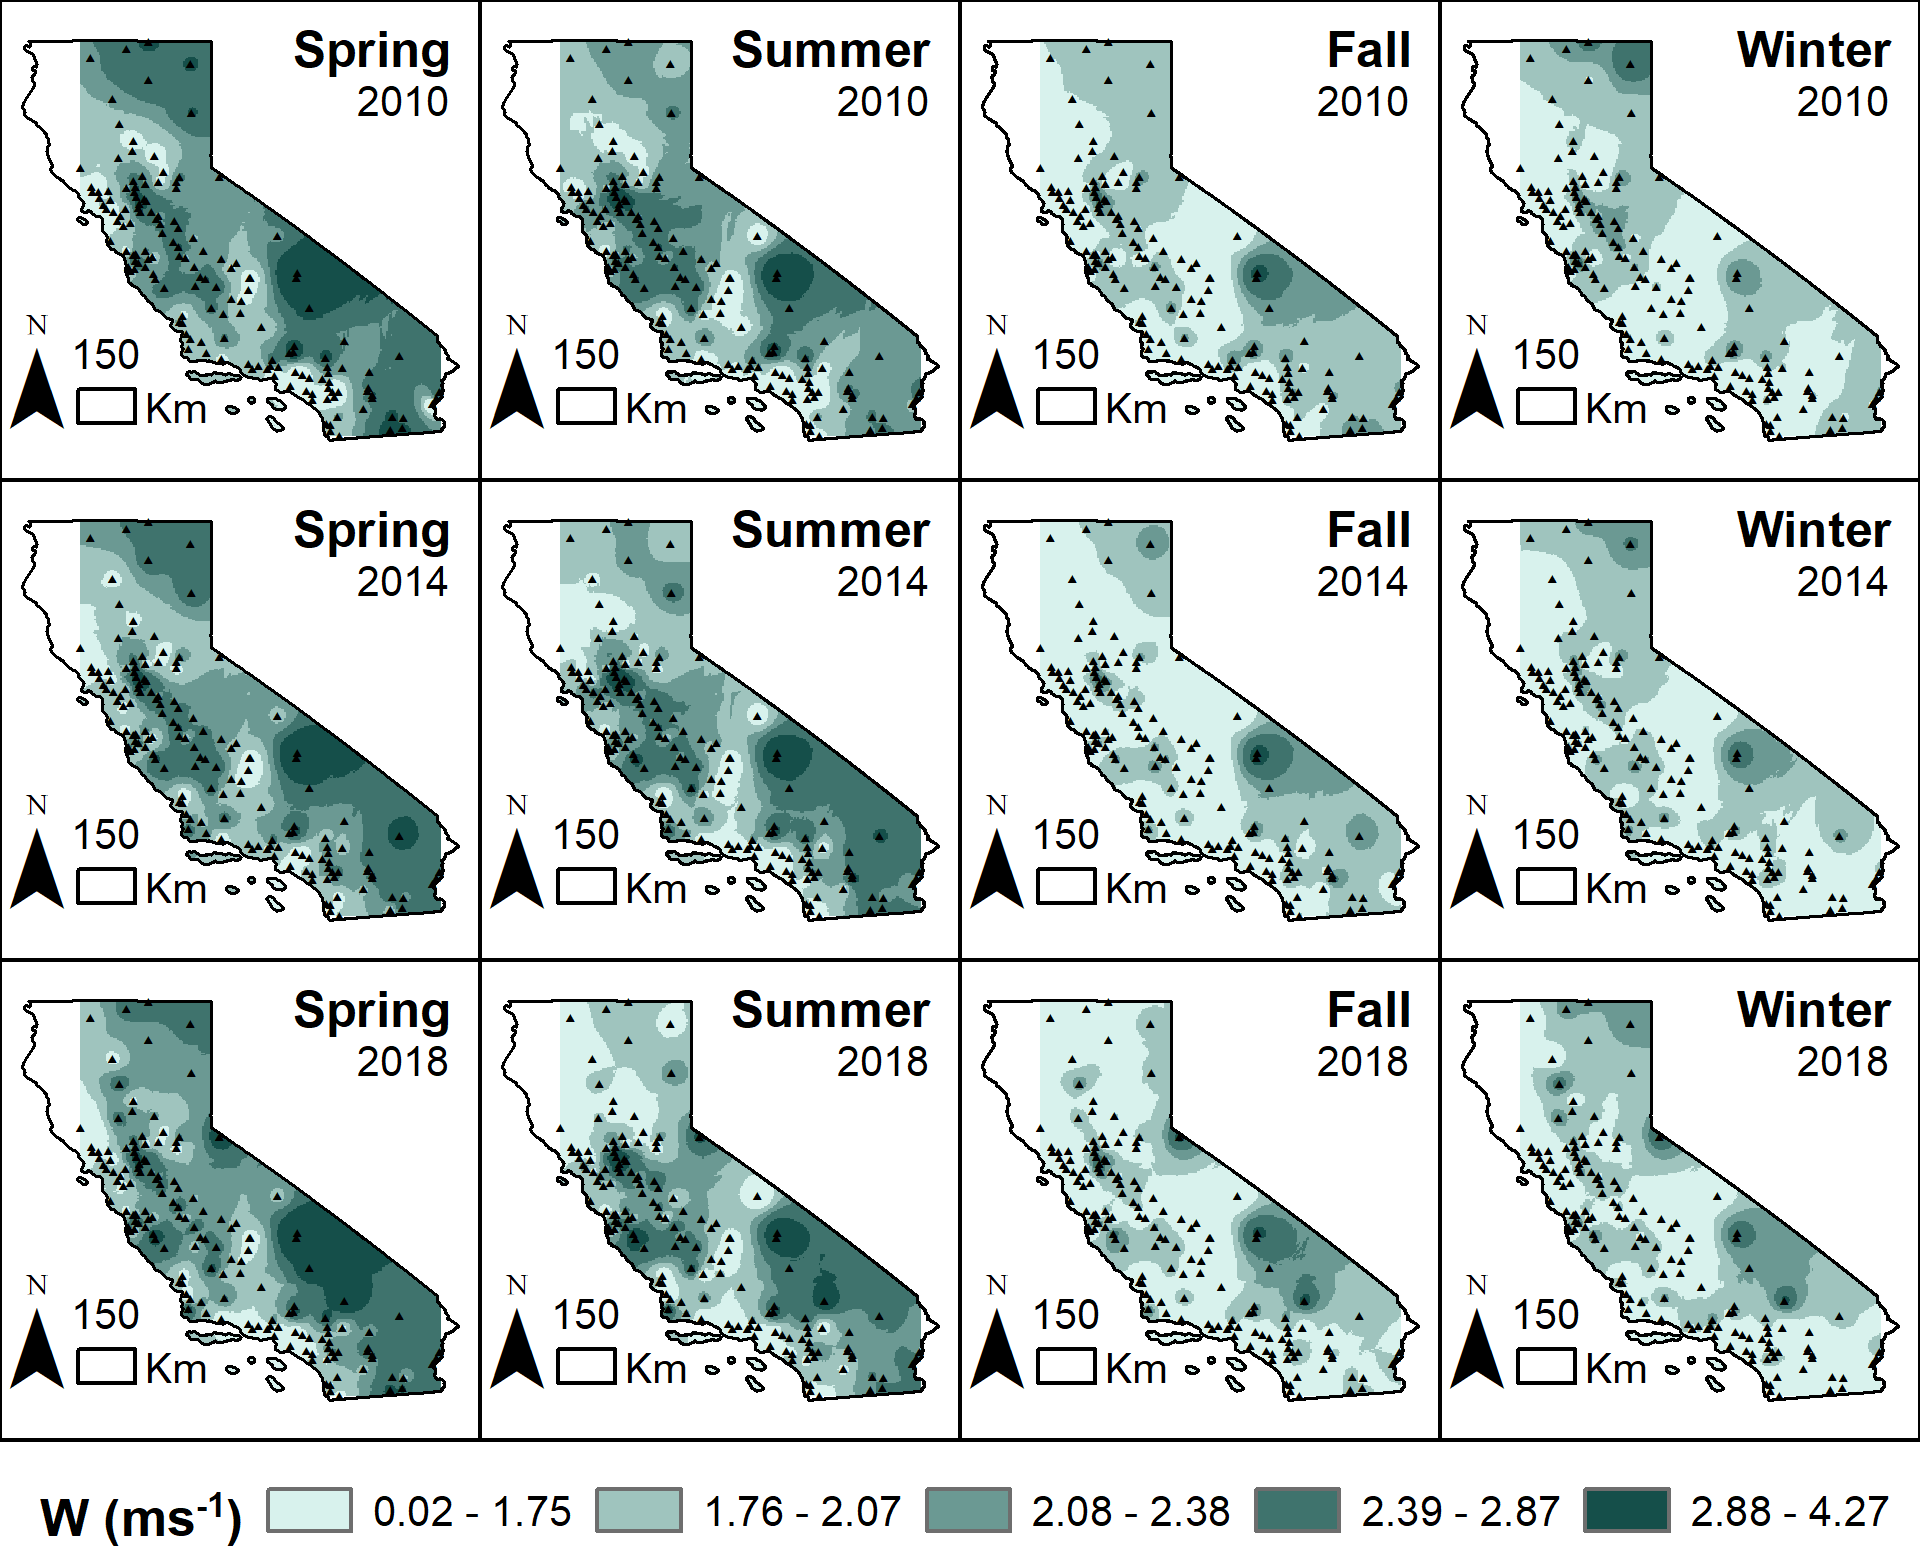


**Figure S5.** Seasonal wind speed magnitude averages in the state of California for years 2010, 2014, and 2018 measured by CIMIS


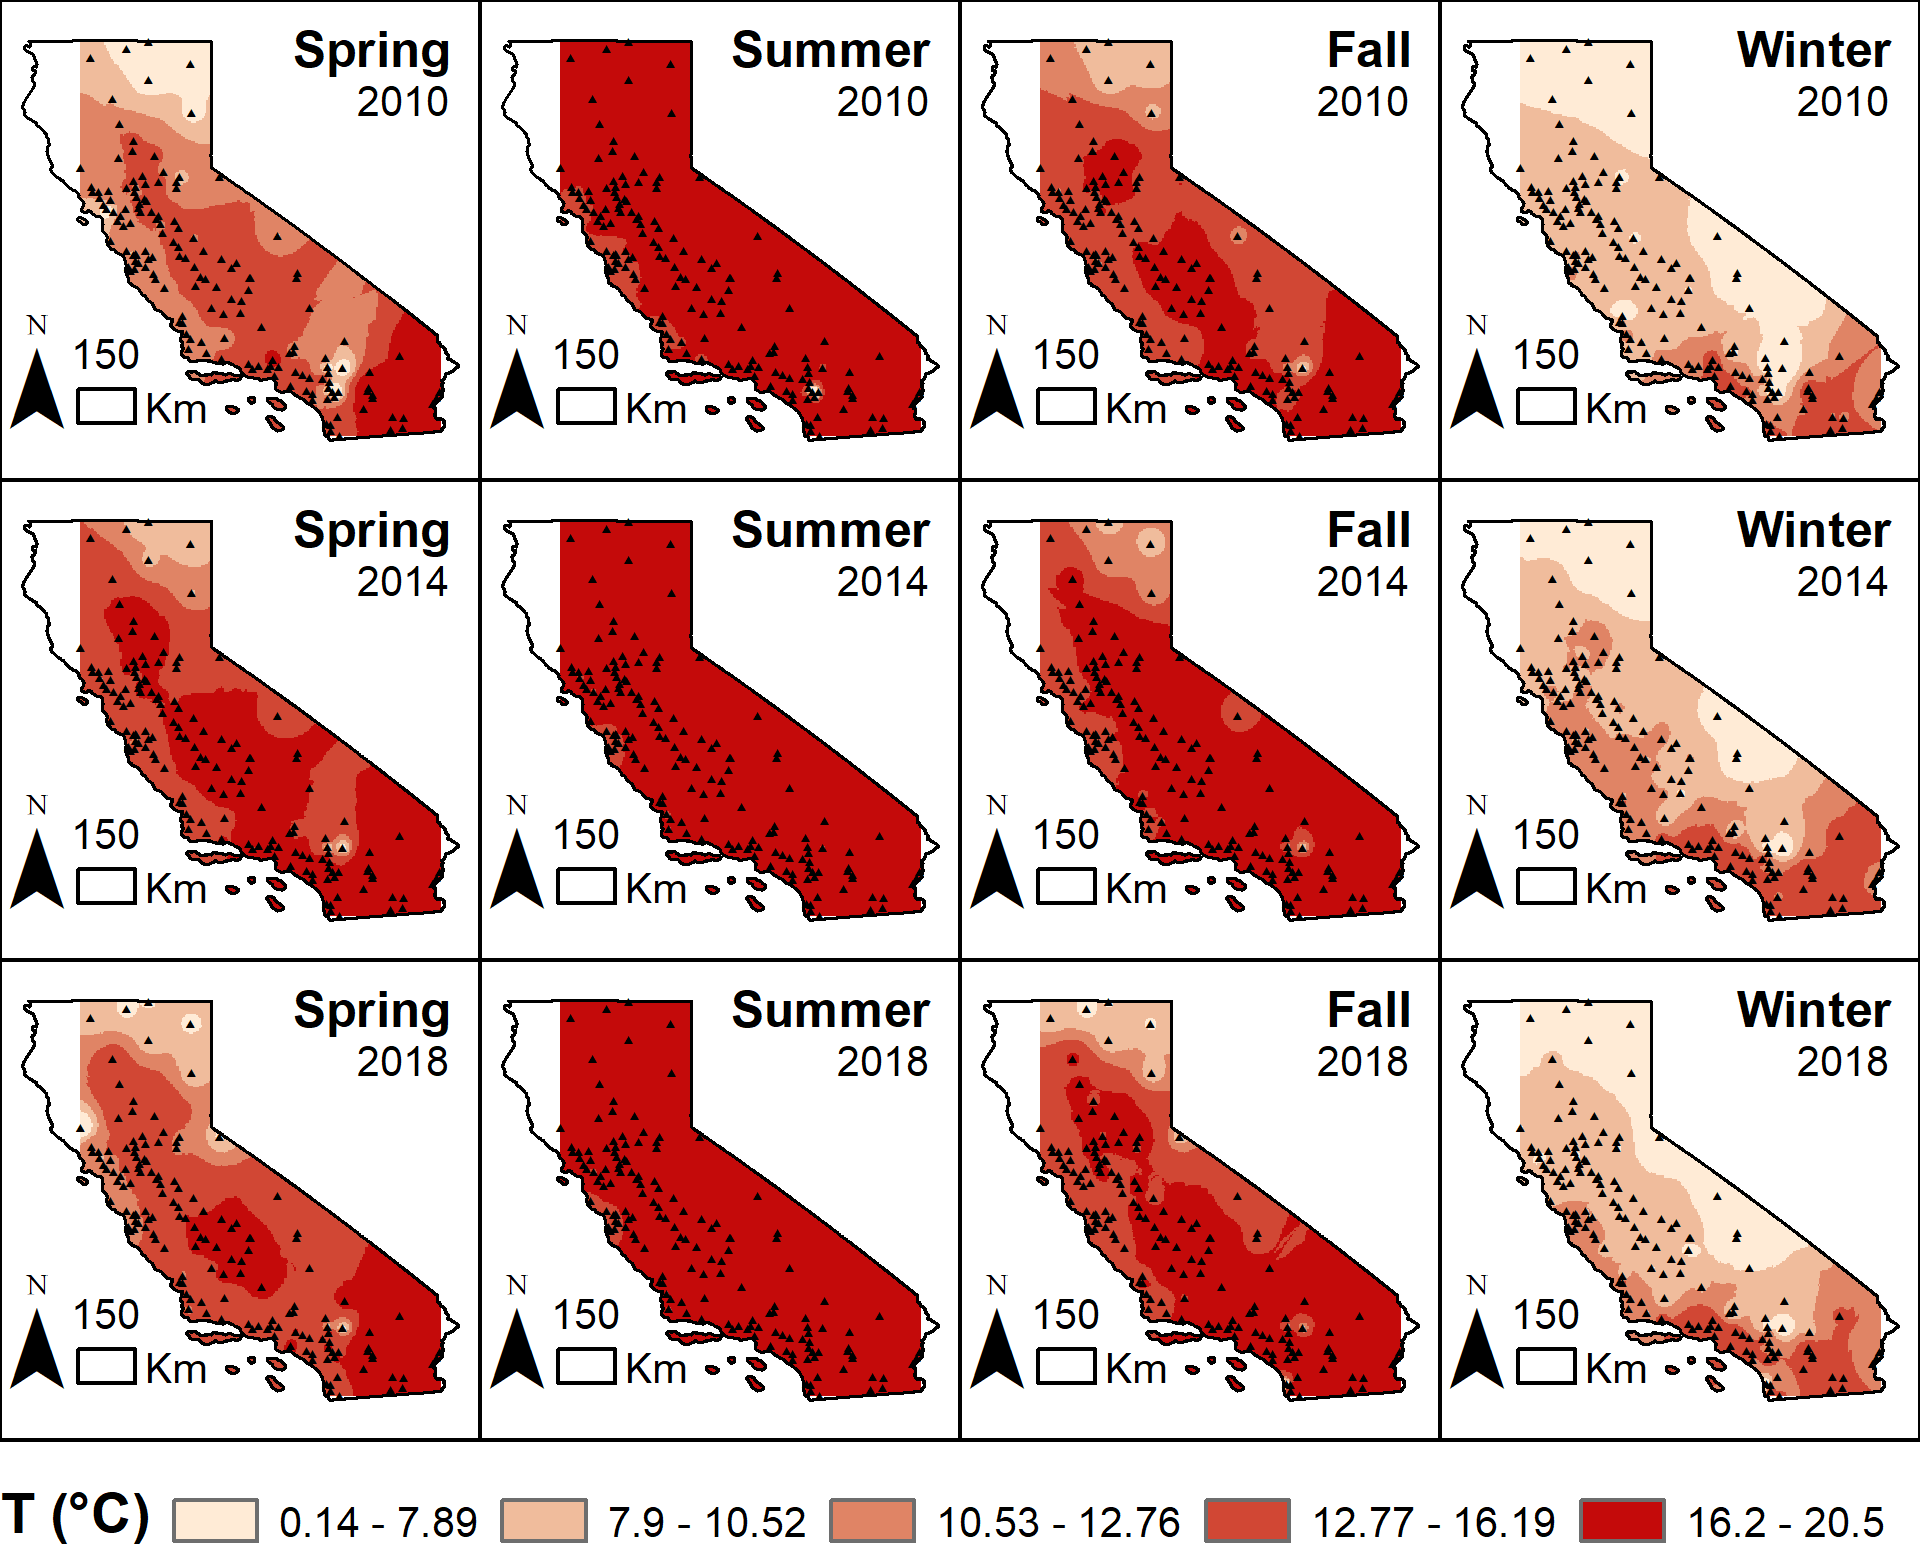


**Figure S6.** Seasonal temperature averages in the state of California for years 2010, 2014, and 2018 measured by CIMIS
